# Supplementary material
Source: PubMed Central journal article supplement (PMC3398755)
Supplement: supp_blood-2011-09-377853_blood-2011-09-377853-1.pdf [file supp_blood-2011-09-377853_blood-2011-09-377853-1.pdf]

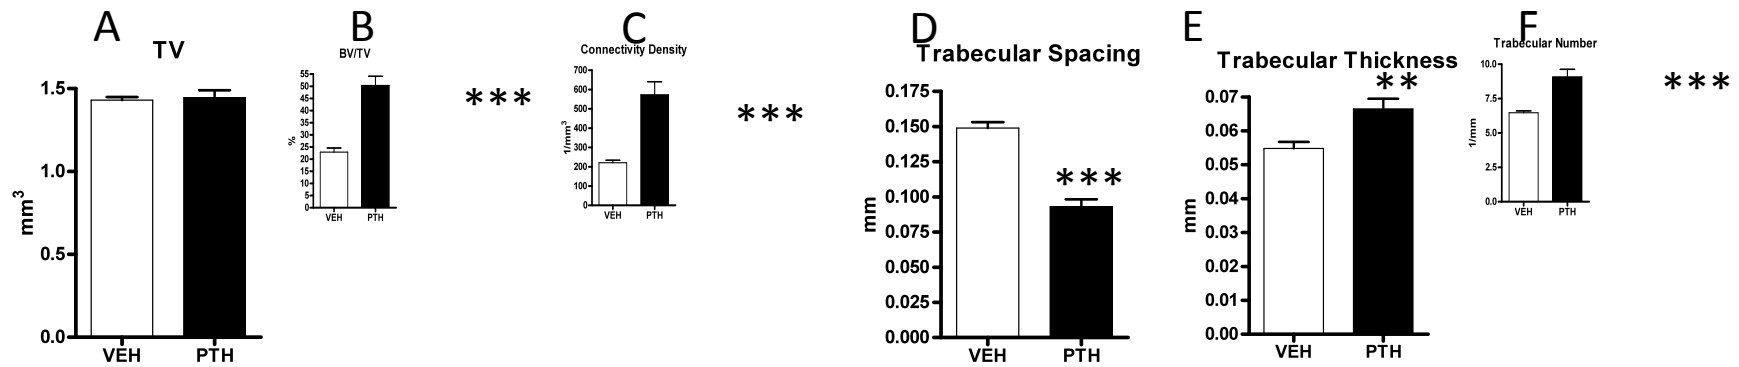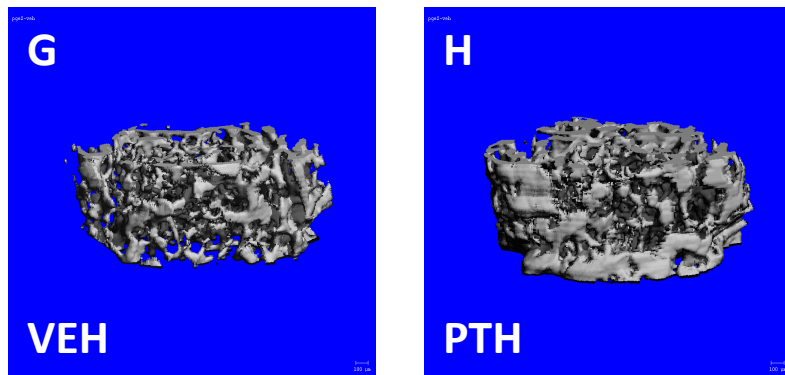

Supplemental figure 1  
**TID PTH treatment increases trabecular bone volume without cortical changes.**

A-F) Micro-CT analysis of trabecular bone from the tibiae of VEH and PTH treated mice; G,H) Representative micro-CT images of trabecular bone from the proximal tibiae of VEH or PTH treated mice; I) Micro-CT analysis of cortical bone from femurs and tibiae of VEH and PTH treated mice

\* p<0.05, \*\* p<0.01, \*\*\* p<0.001. n= 5-6 per treatment group

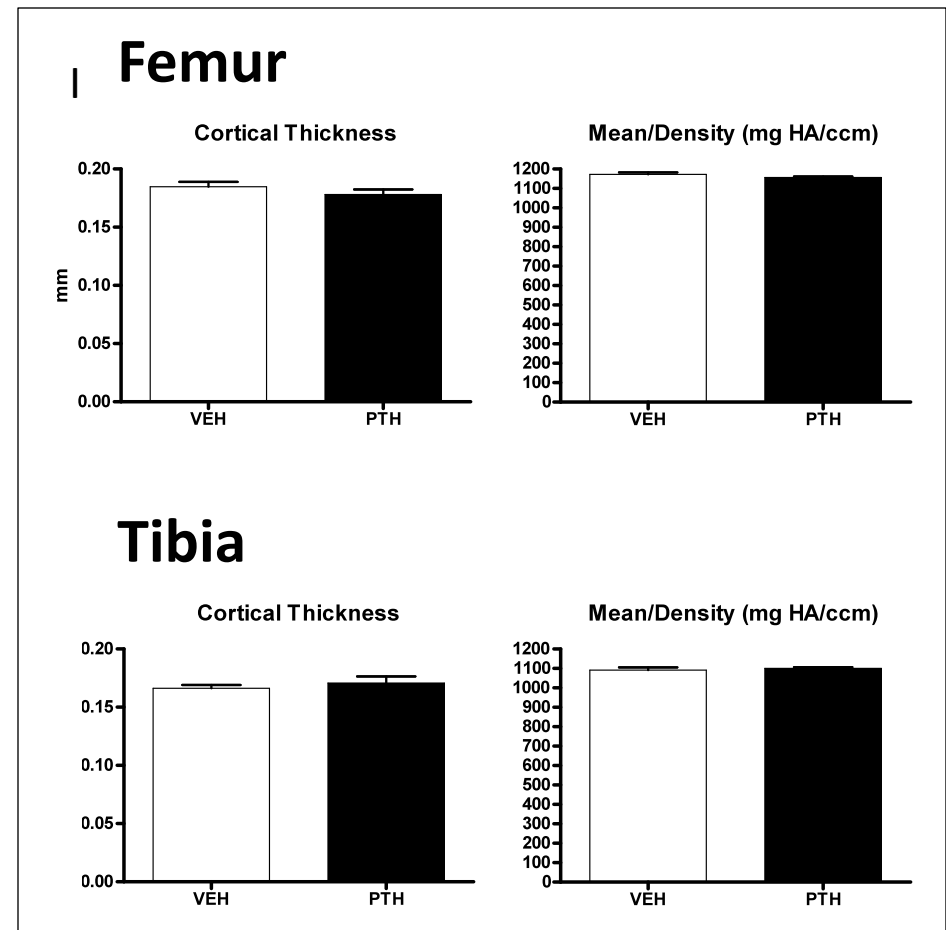

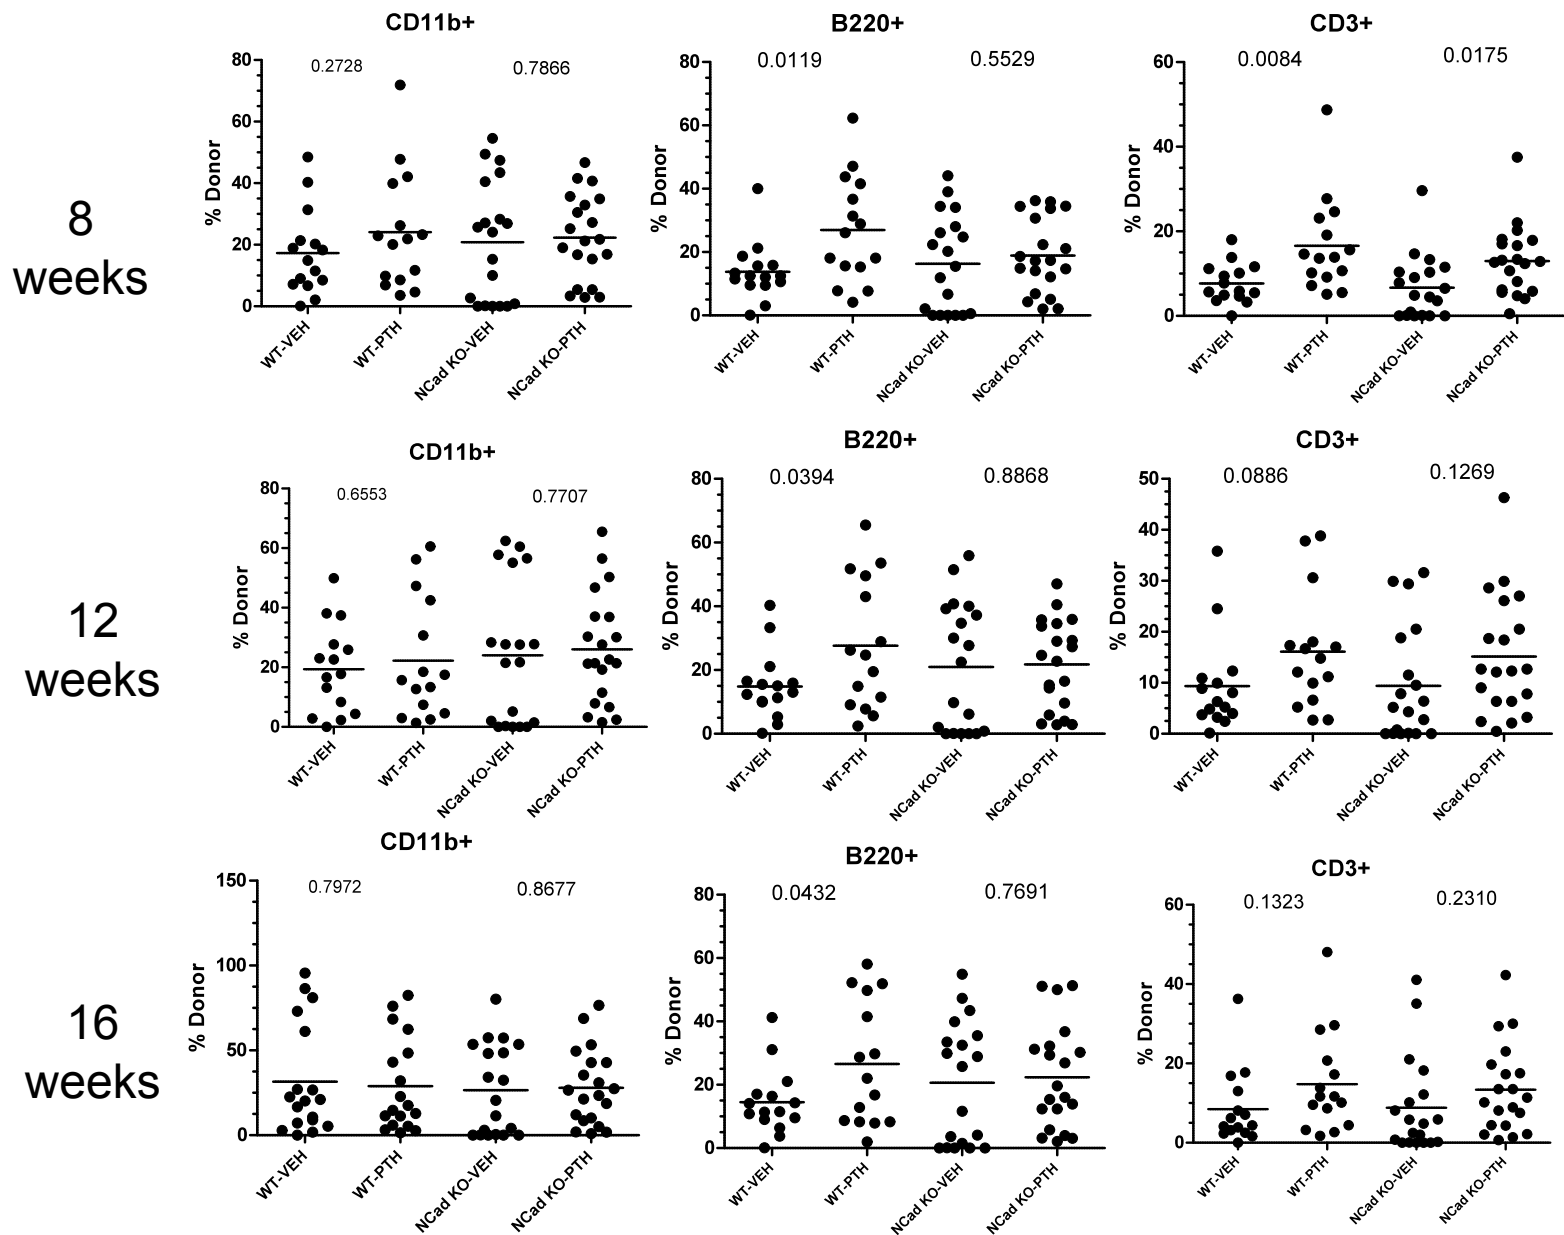

Supplemental figure 2: Osteoblastic N-Cadherin is not required for PTH mediated expansion of HSCs. Percent of CD11b+ (left panels), B220+ (middle panels), and CD3+ (right panels) peripheral blood cells derived from engrafted donor cells. Donor type indicated on the x-axis. Analysis was performed at 8, 12 and 16 weeks. Each dot represents an individual recipient mouse.

SUPPLEMENTAL TABLE 1

| <b>Antibody</b> | <b>Conjugated to</b> | <b>Clone</b> | <b>Supplier</b> |
|-----------------|----------------------|--------------|-----------------|
| B220 (CD45R)    | Biotin               | RA3-6B2      | eBiosciences    |
| Gr1 (Ly6G)      | Biotin               | RB6-8C5      | eBiosciences    |
| CD3e            | Biotin               | 145-2C11     | eBiosciences    |
| Ter119          | Biotin               | TER119       | eBiosciences    |
| c-kit (CD117)   | PE-Cy5               | 2B8          | eBiosciences    |
| Sca-1 (Ly6a/e)  | PerCP-Cy5.5          | D7           | eBiosciences    |
| FIt3            | PE                   | A2F10        | eBiosciences    |
| Thy1.1 (CD90.1) | PE-Cy7               | HIS51        | eBiosciences    |
| CD150           | APC                  | 9D1          | eBiosciences    |
| CD48            | FITC                 | HM48-1       | BioLegend       |
| Streptavidin    | PE-Texas Red         |              | BD Biosciences  |
| CD11b           | APC-Alexa780         | M1/70        | eBiosciences    |
| B220 (CD45R)    | APC                  | RA3-6B2      | eBiosciences    |
| CD3             | PerCP-Cy5.5          | 145-2C11     | eBiosciences    |
| CD45.1          | PE                   | A20          | BD Biosciences  |
| CD45.2          | FITC                 | 104          | BD Biosciences  |
